# Supplementary material for: Synthesis and characterization of novel electrochromic and photoresponsive materials based on azobenzene-4,4′-dicarboxylic acid dialkyl ester
Source: Royal Society of Chemistry journal article supplement (doi:10.1039/c4tc01205d), 2014-01-01
Supplement: c4tc01205d1.pdf [file c4tc01205d1.pdf]

## Electronic Supporting Information

### 1. Colors of sandwich-type ECDs based on ADDEDs

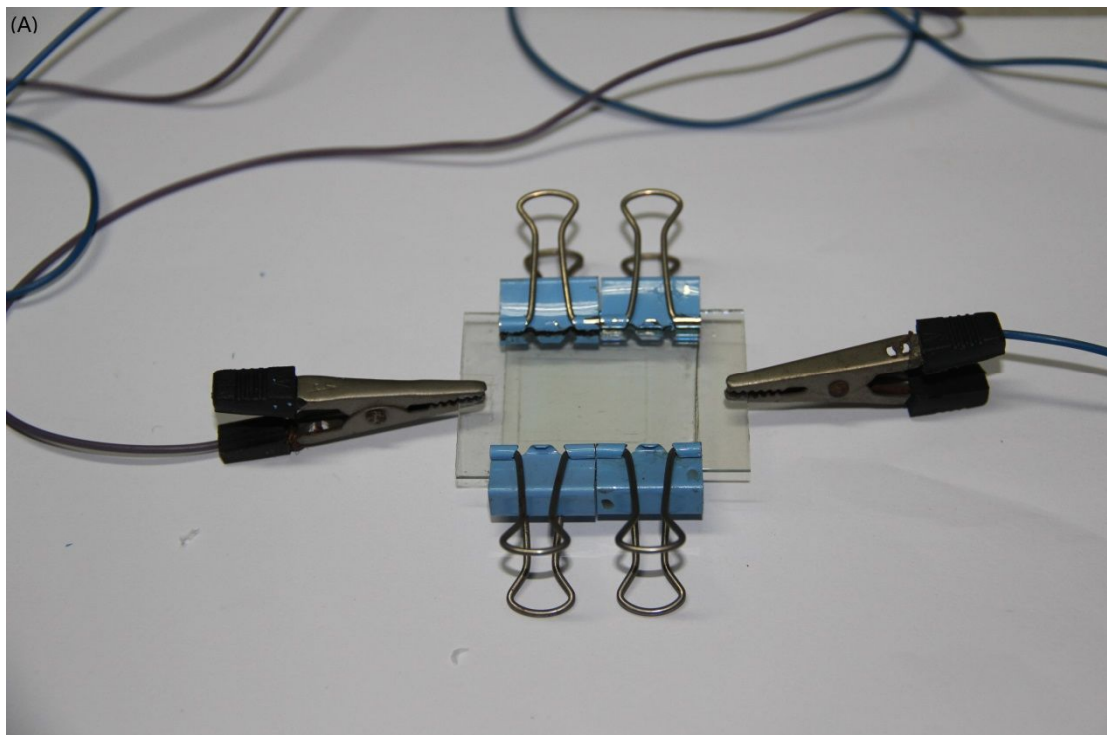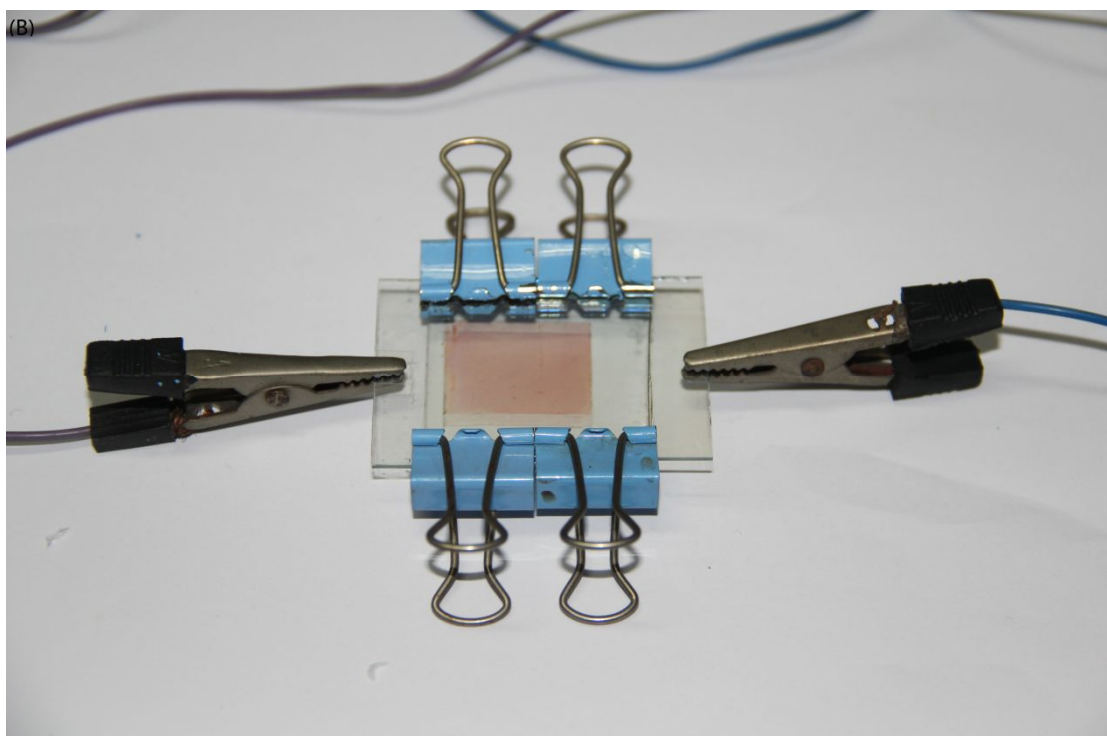

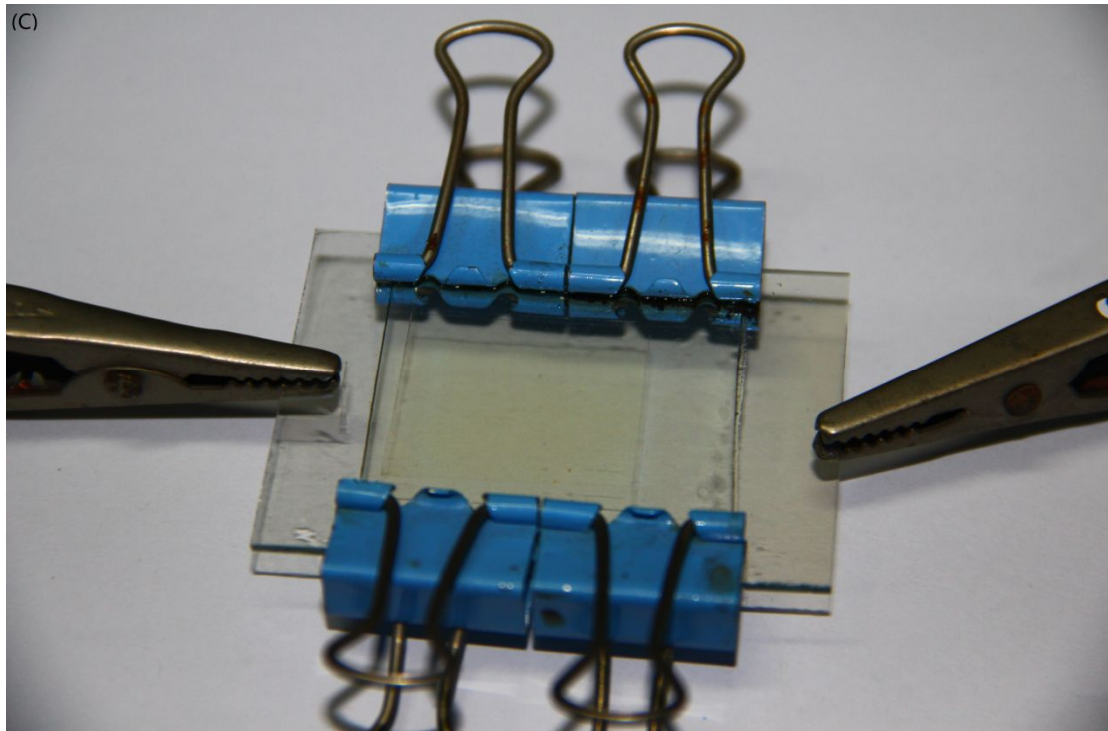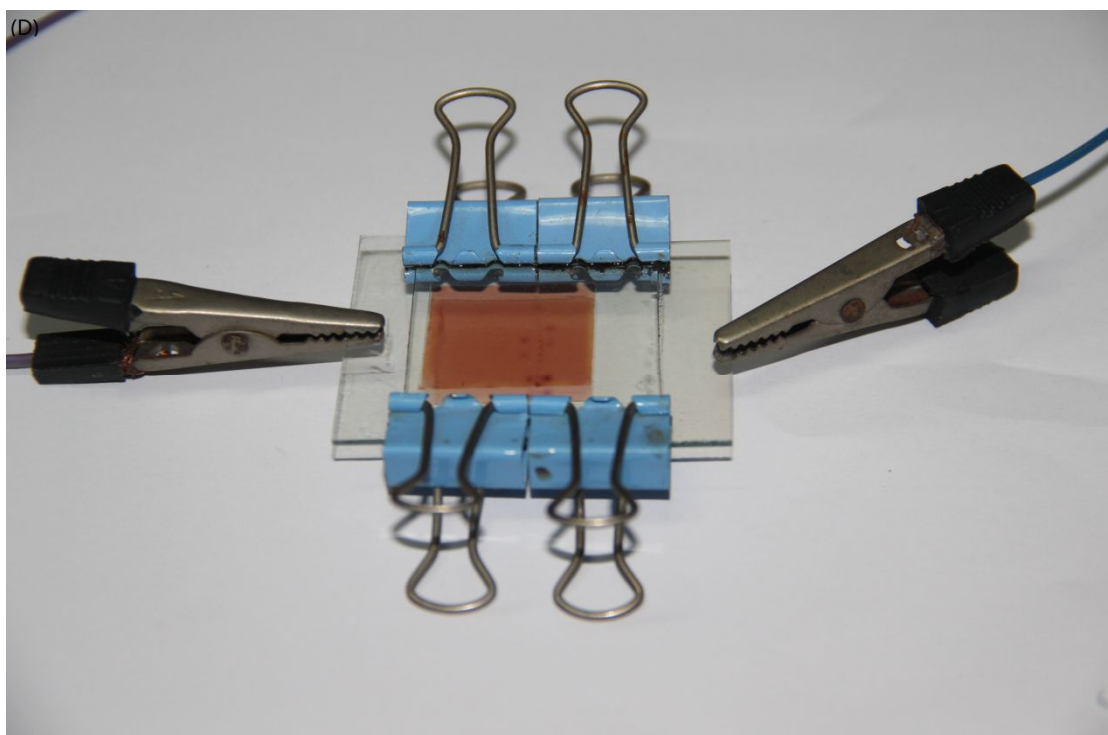

(E)

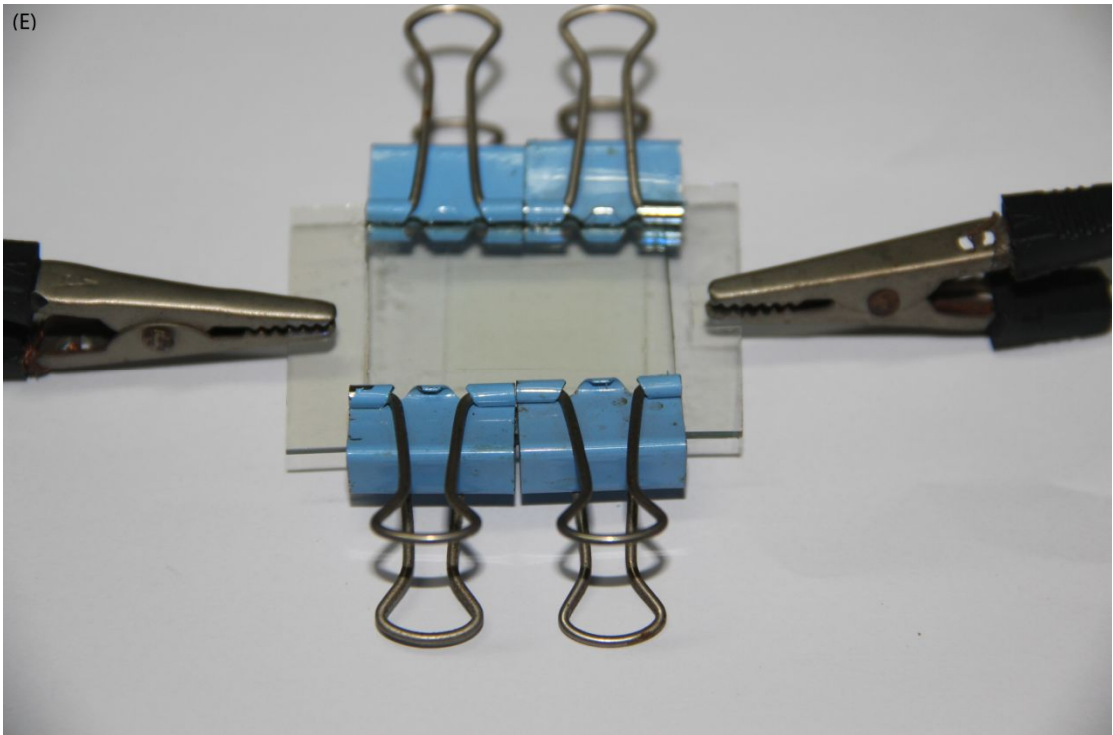

(F)

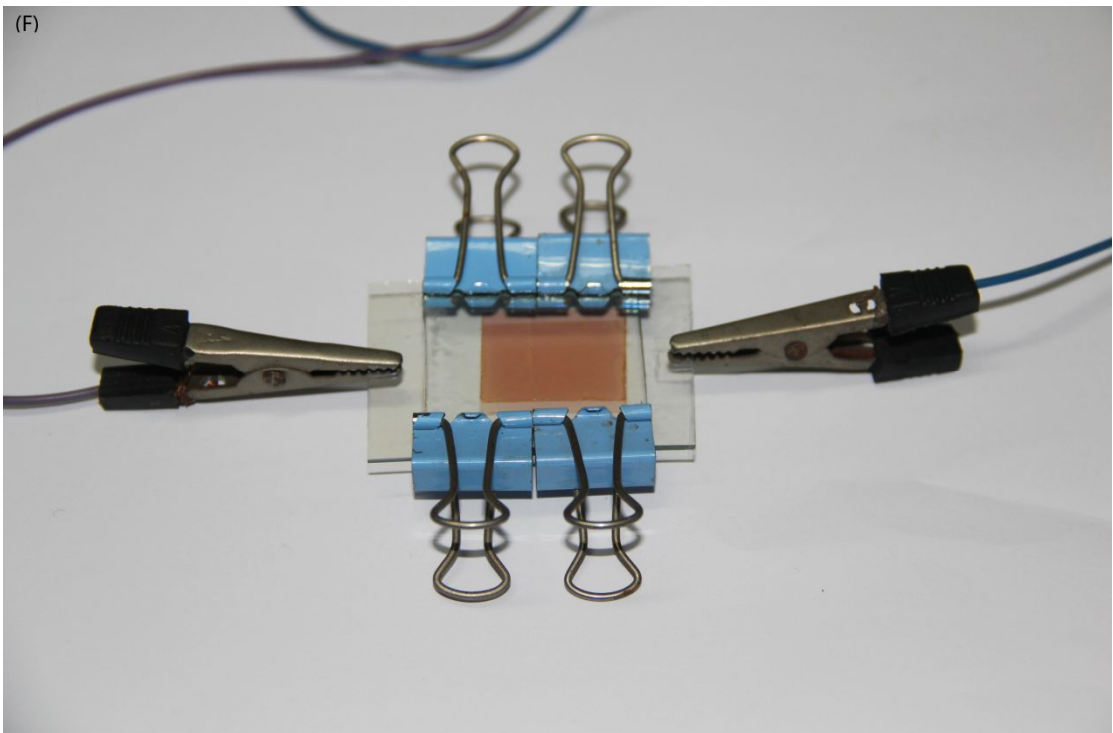

(G)

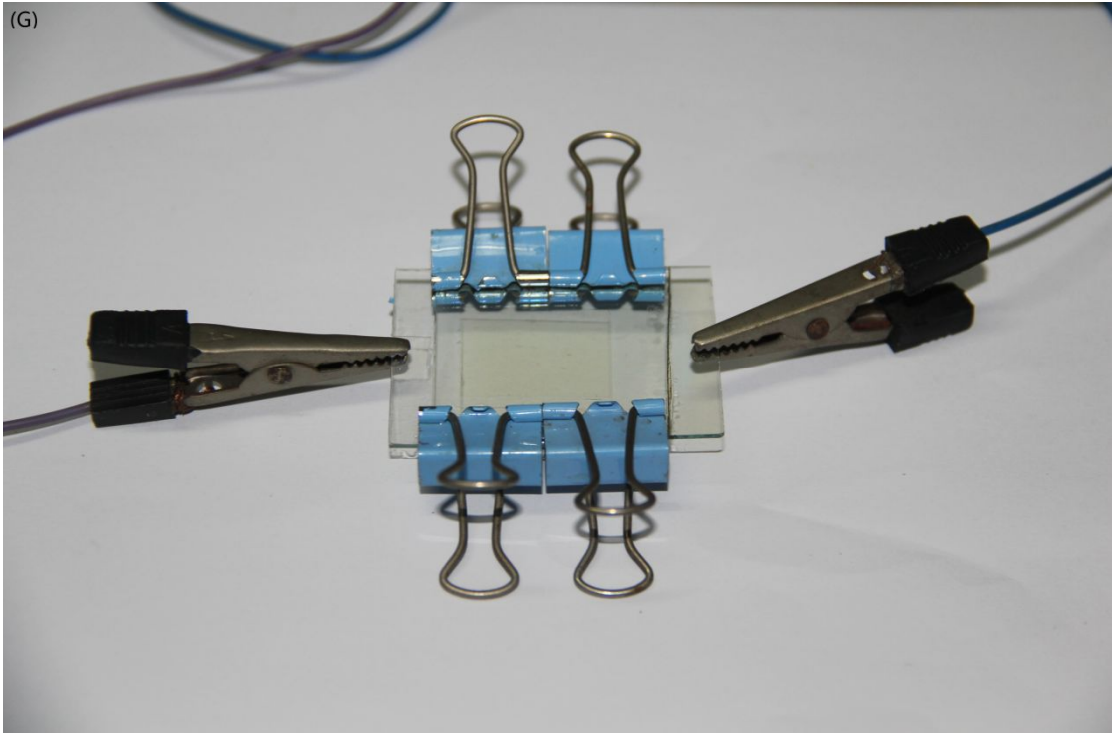

(H)

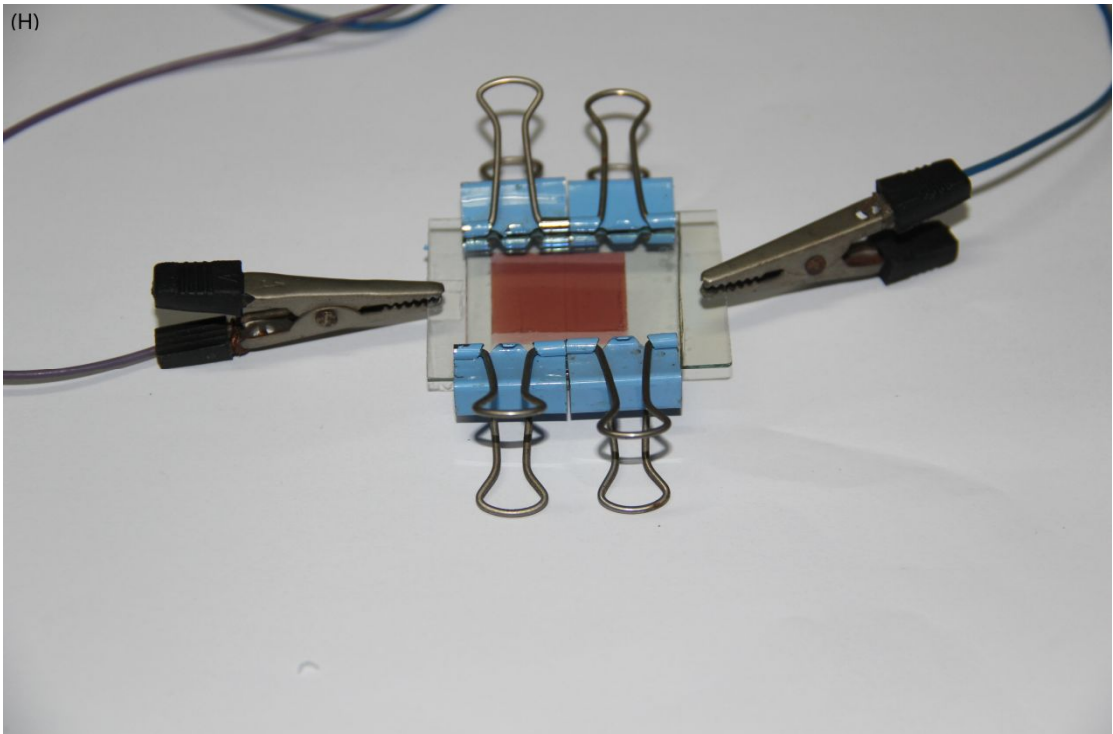

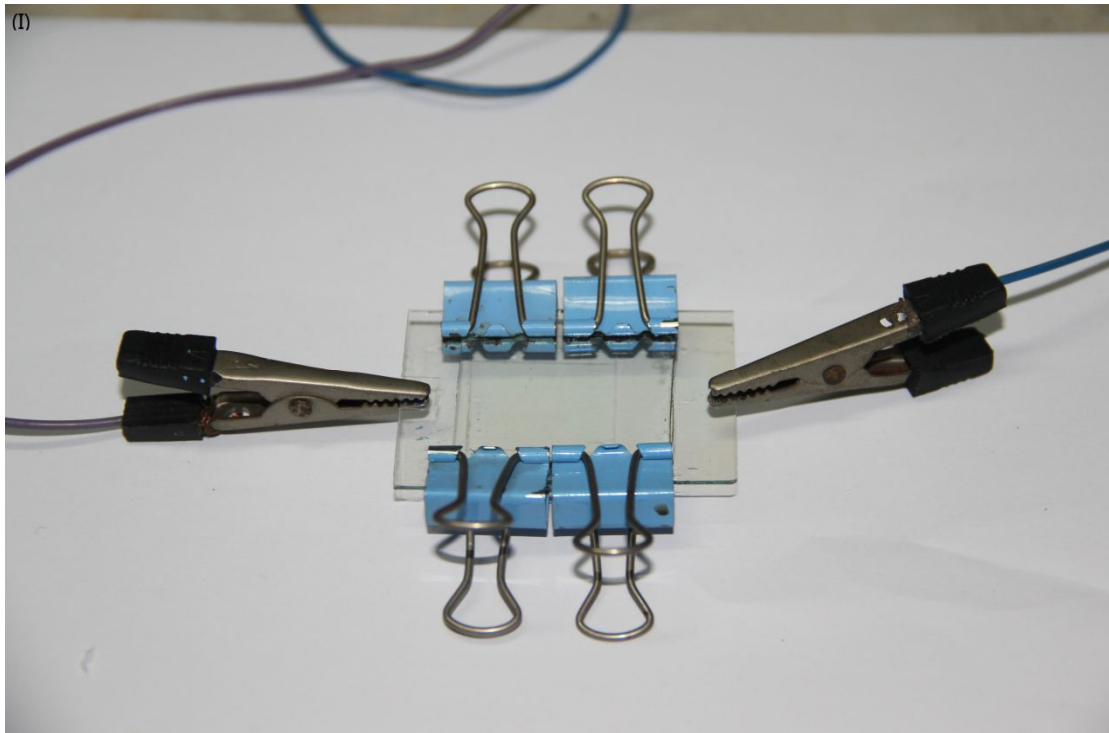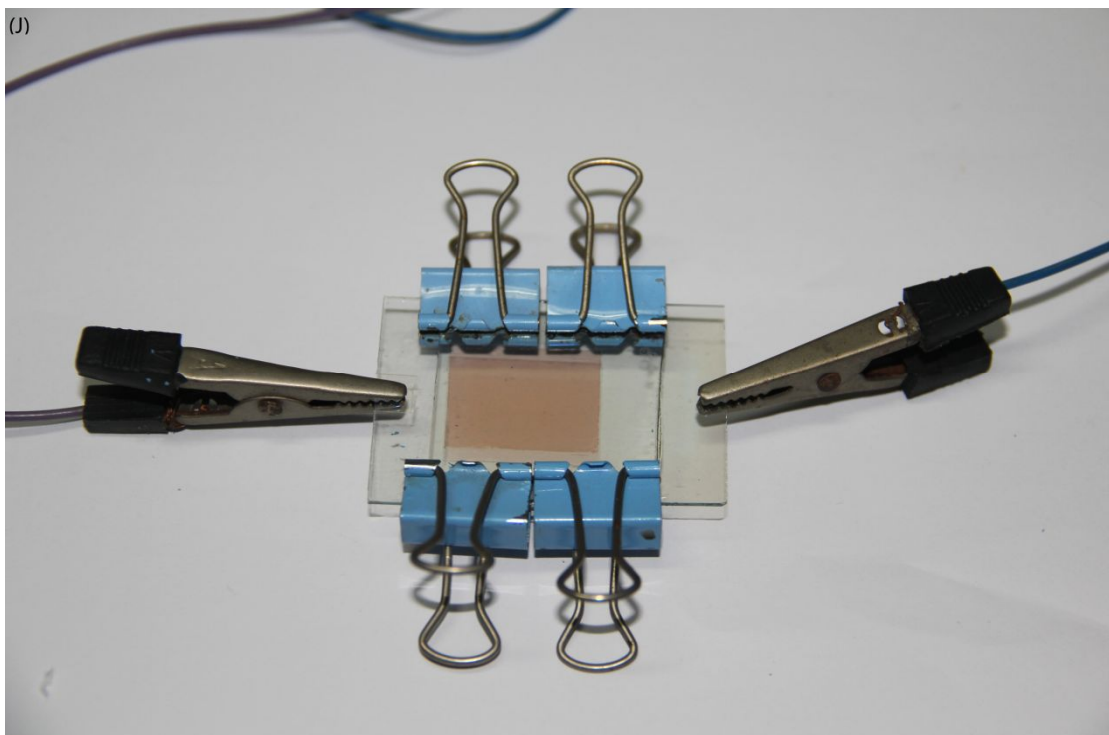

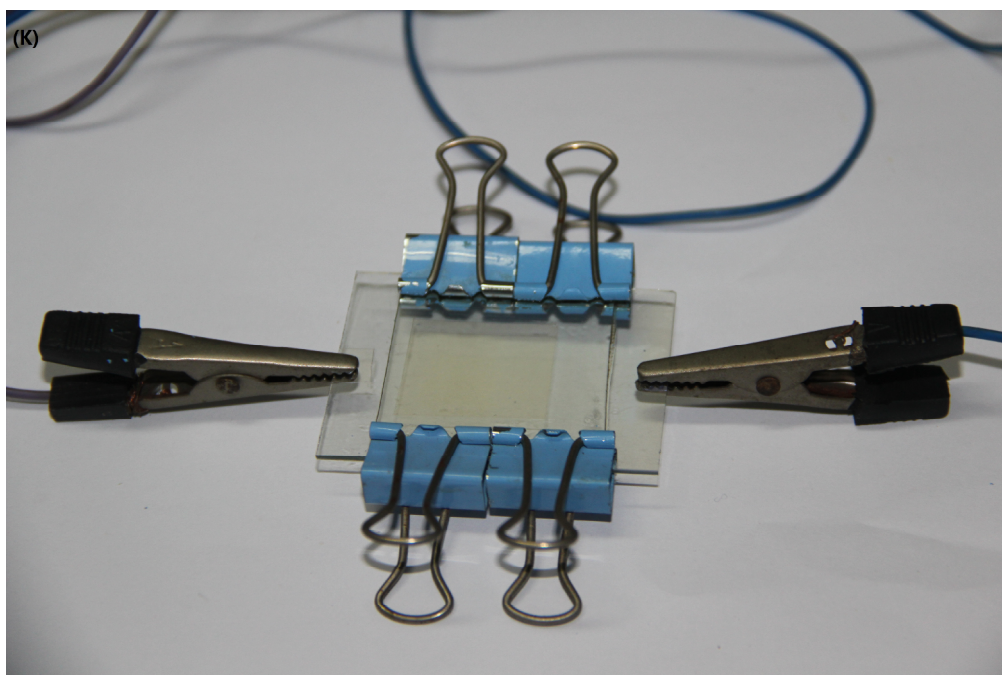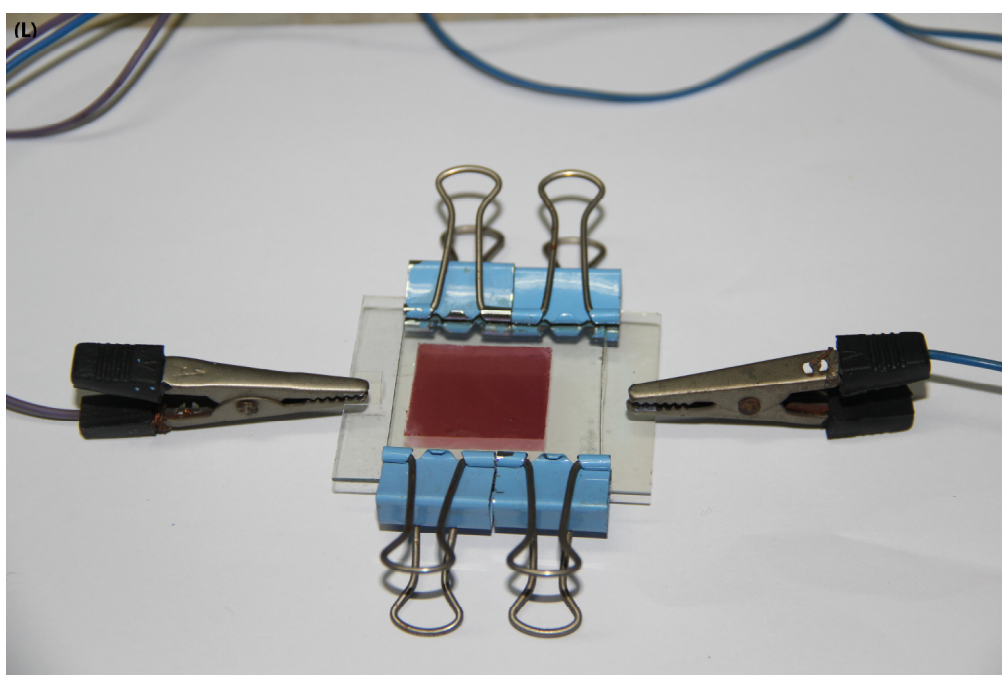

**S.Fig. 1.** Colors of sandwich-type ECDs based on ADDEDs: (A) bleached state and (B) colored state at 3.0 V for compound **a**; (C) bleached state and (D) colored state at 3.0 V for compound **b**; (E) bleached state and (F) colored state at 3.0 V for compound **c**; (G) bleached state and (H) colored state at 3.0 V for compound **d**; (I) bleached state and (J) colored state at 3.0 V for compound **e**; and (K) bleached state and (L) colored state at 3.0 V for compound **f**.

## 2. Optical transmittance for ECDs based on ADDEDs

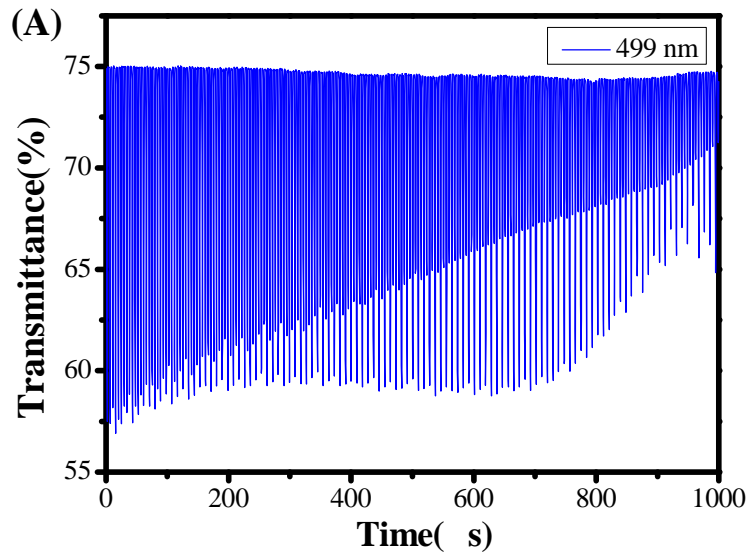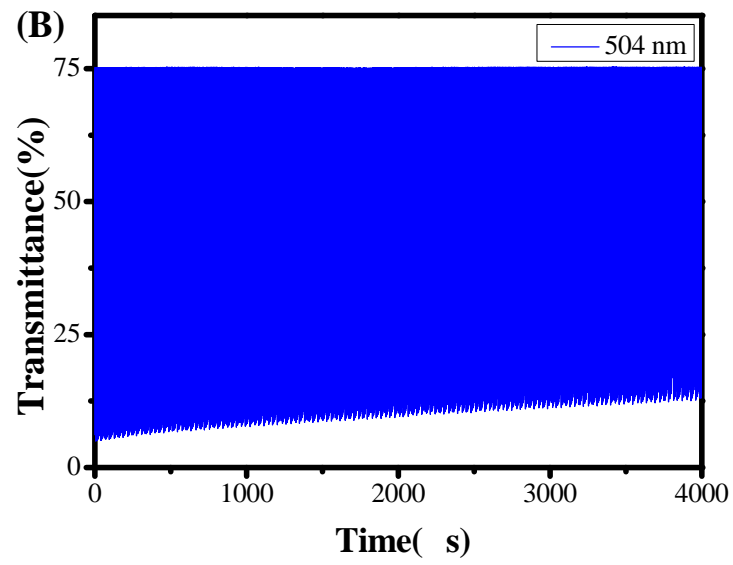

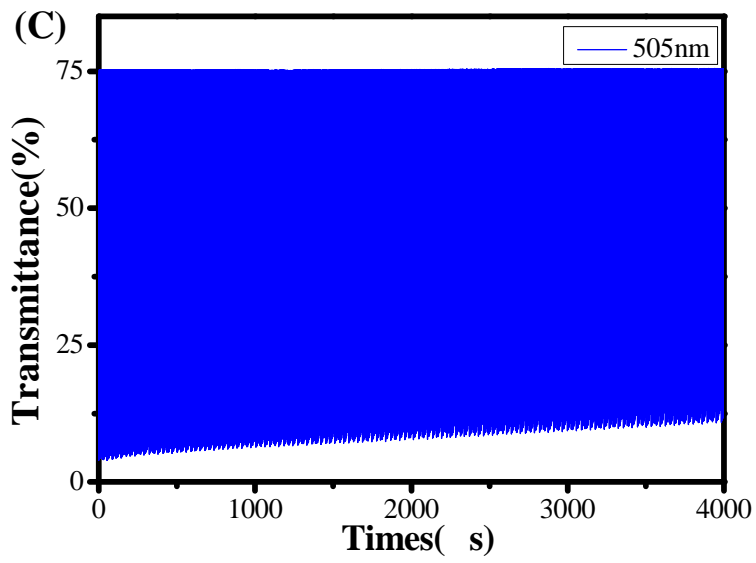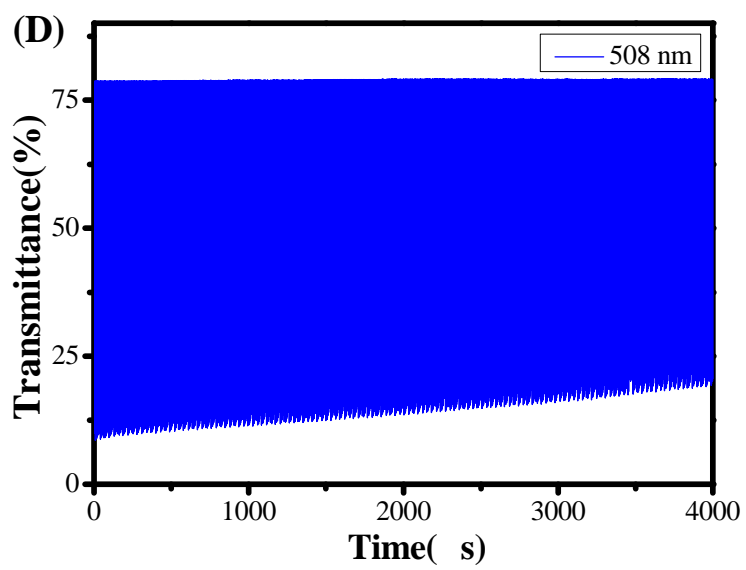



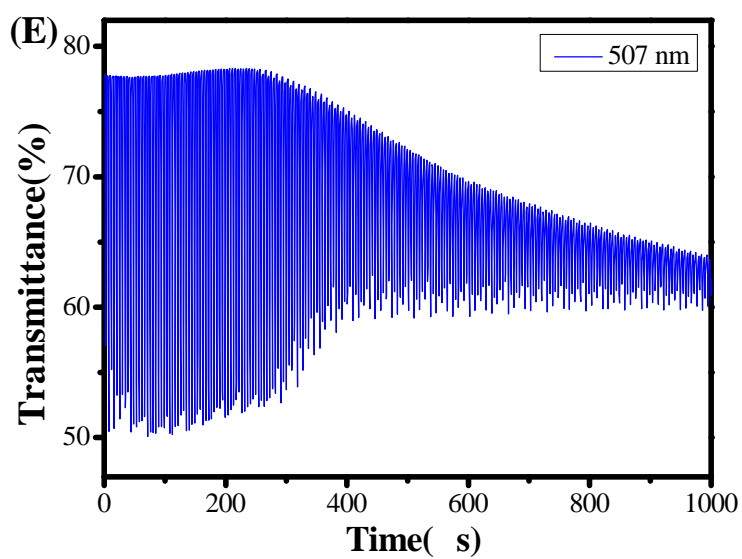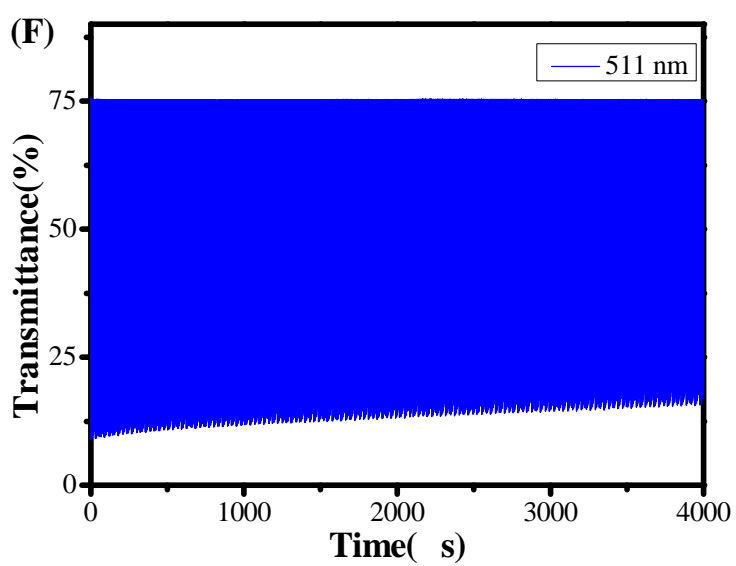

**S.Fig. 2.** Optical transmittance for ADDEDs monitored at (A) 499 nm, (B) 504 nm, (C) 505 nm, (D) 508 nm, (E) 507nm, and (F) 511 nm for compounds **a**, **b**, **c**, **d**, **e**, and **f**, respectively, between  $-3.0$  V and  $+3.0$  V.

### 3. UV-vis spectra and spectral changes of compounds a, b, c, e and f in DMF and under electrochromic conditions

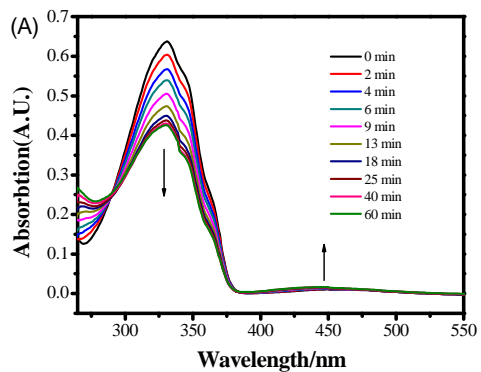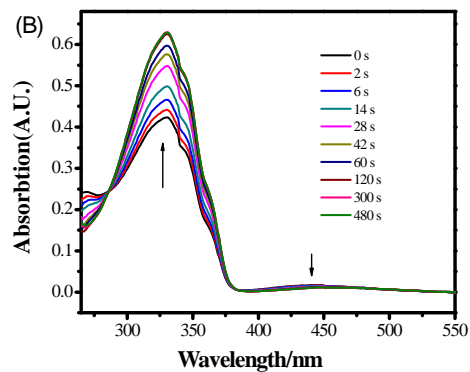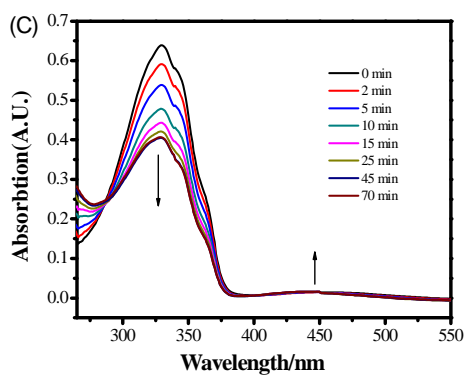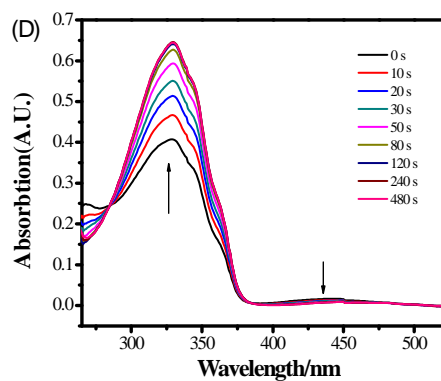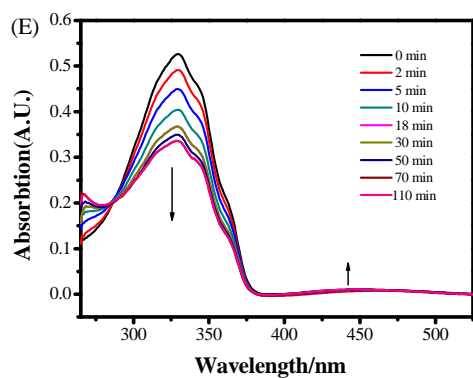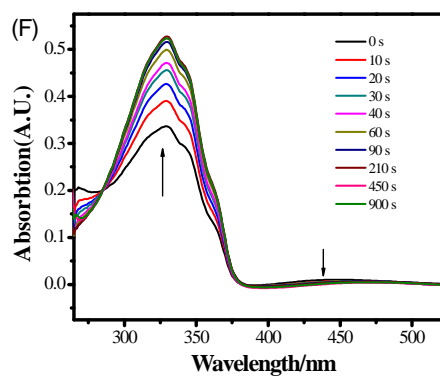

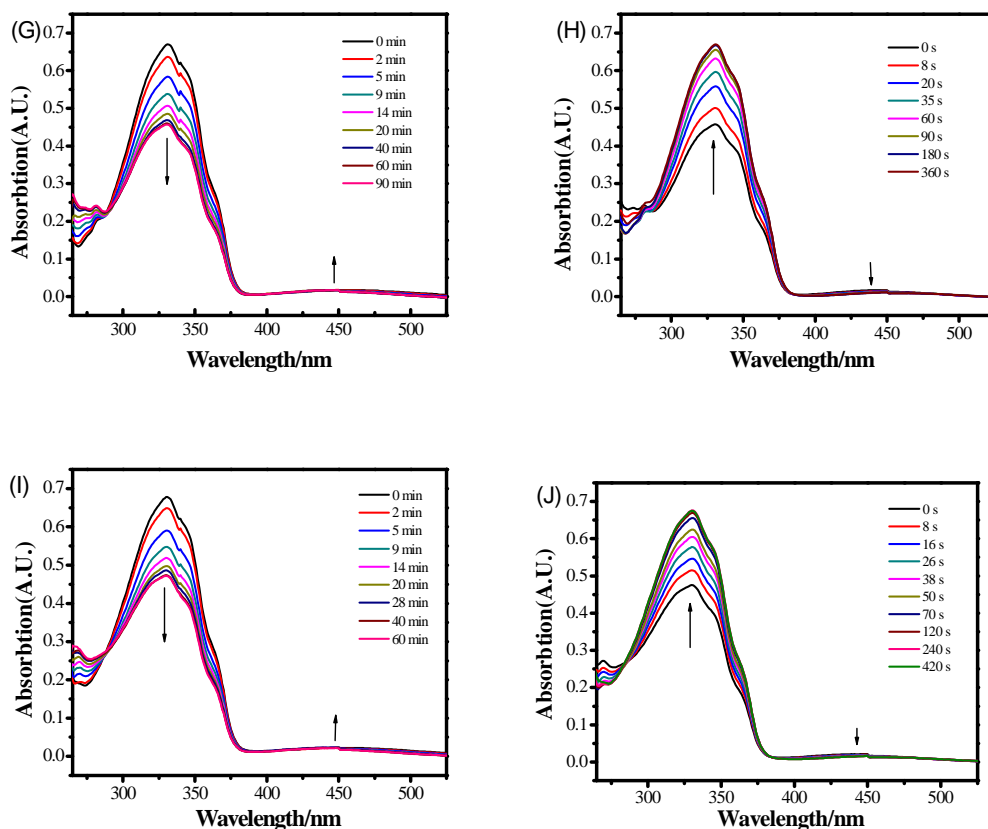

**S.Fig. 3.** UV-vis spectra and spectral changes of ADDEDs ( $2.0 \times 10^{-5} \text{ mol L}^{-1}$ ) in DMF solution : (A) upon irradiation at 365 nm and (B) upon irradiation at 440 nm for compound **a**; (C) upon irradiation at 365 nm and (D) upon irradiation at 440 nm for compound **b**; (E) upon irradiation at 365 nm and (F) upon irradiation at 440 nm for compound **c**; (G) upon irradiation at 365 nm and (H) upon irradiation at 440 nm for compound **e**; (I) upon irradiation at 365 nm and (J) upon irradiation at 440 nm for compound **f**.

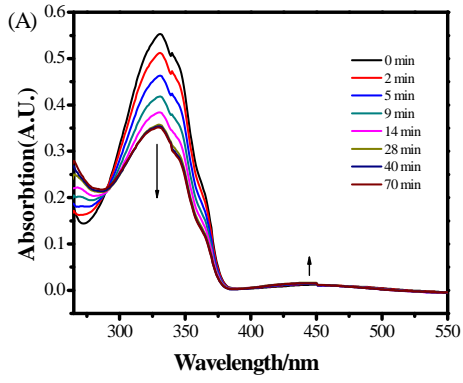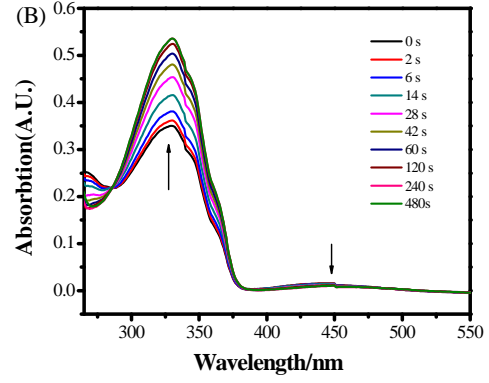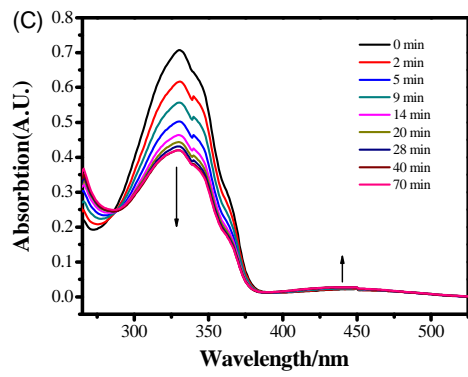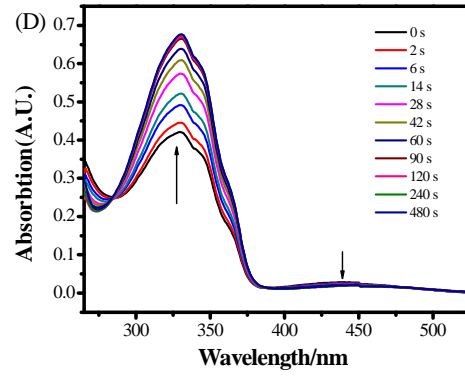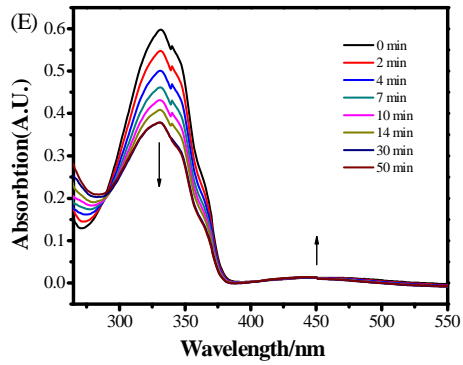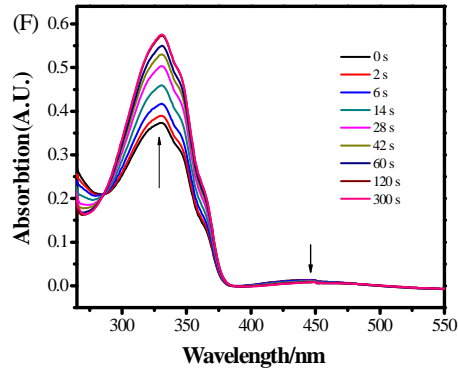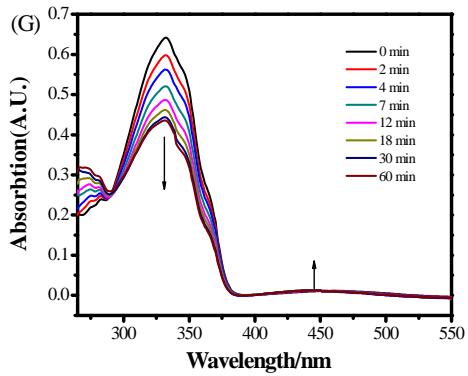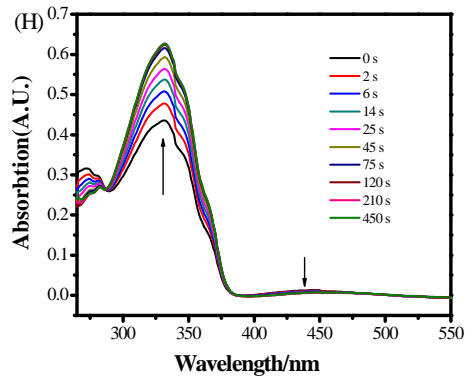

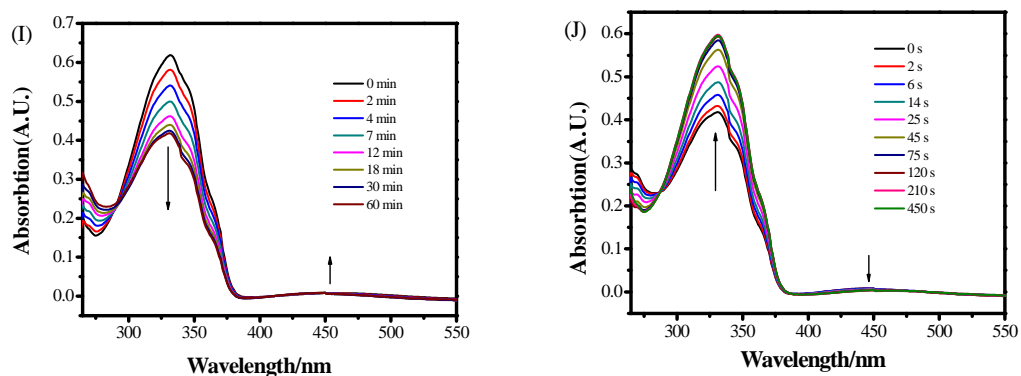

**S.Fig. 4.** UV-vis spectra and spectral changes of ADDEDs ( $2.0 \times 10^{-5} \text{ mol L}^{-1}$ ) in TBAP and ferrocene in DMF solution: (A) upon irradiation at 365 nm and (B) upon irradiation at 440 nm for compound **a**; (C) upon irradiation at 365 nm and (D) upon irradiation at 440 nm for compound **b**; (E) upon irradiation at 365 nm and (F) upon irradiation at 440 nm for compound **c**; (G) upon irradiation at 365 nm and (H) upon irradiation at 440 nm for compound **e**; (I) upon irradiation at 365 nm and (J) upon irradiation at 440 nm for compound **f**.
